# Supplementary material for: Simultaneous Determination of Thirteen Q-Markers in Raw and Processed Tussilago farfara L. by UPLC-QQQ-MS/MS Coupled with Chemometrics
Source: PubMed Central journal article supplement (PMC6385167; doi:10.3390/molecules24030598), 2019-02-08
Supplement: molecules-24-00598-s001.pdf [file molecules-24-00598-s001.pdf]

**Support 1 (A). Extraction efficiency of different solvents combinations (µg/g, n=3)**

|                            | Methanol/Water |       |         |       |         |       |         |       | Ethanol/Water |       |         |       |         |       |         |       |
|----------------------------|----------------|-------|---------|-------|---------|-------|---------|-------|---------------|-------|---------|-------|---------|-------|---------|-------|
|                            | 100%           |       | 85%     |       | 70%     |       | 50%     |       | 100%          |       | 85%     |       | 70%     |       | 50%     |       |
|                            | Mean           | SD    | Mean    | SD    | Mean    | SD    | Mean    | SD    | Mean          | SD    | Mean    | SD    | Mean    | SD    | Mean    | SD    |
| Gallic acid                | 14.46          | 0.59  | 20.27   | 0.94  | 18.21   | 0.42  | 11.87   | 0.14  | 2.10          | 0.11  | 17.6    | 0.20  | 8.19    | 0.44  | 1.28    | 0.89  |
| Neochlorogenic acid        | 365.70         | 4.28  | 388.52  | 5.68  | 370.68  | 2.04  | 254.15  | 1.38  | 65.15         | 3.26  | 303.05  | 4.97  | 307.78  | 1.89  | 292.65  | 0.77  |
| Chlorogenic acid           | 4673.11        | 39.49 | 5142.08 | 22.98 | 4885.84 | 31.50 | 4729.05 | 27.05 | 1020.50       | 1.80  | 4023.94 | 7.74  | 4133.99 | 6.04  | 4077.16 | 22.29 |
| Caffeic acid               | 144.95         | 0.80  | 153.93  | 1.35  | 145.77  | 1.21  | 135.48  | 1.26  | 39.12         | 0.44  | 124.62  | 0.67  | 122.34  | 0.32  | 102.27  | 2.74  |
| Cryptochlorogenic acid     | 603.43         | 49.35 | 678.81  | 28.46 | 667.69  | 4.91  | 664.46  | 4.19  | 169.05        | 0.75  | 556.18  | 5.50  | 550.29  | 1.02  | 528.57  | 22.32 |
| 3,4-dicaffeoylquinic acids | 3066.75        | 5.01  | 3722.77 | 79.96 | 3610.57 | 15.17 | 3573.12 | 60.88 | 988.52        | 30.09 | 2937.94 | 11.52 | 2825.01 | 34.02 | 2863.09 | 11.38 |
| Hyperoside                 | 1288.50        | 10.66 | 1317.51 | 1.82  | 1239.51 | 5.97  | 1126.71 | 8.16  | 503.75        | 3.29  | 1075.92 | 1.08  | 1062.66 | 2.16  | 975.18  | 41.18 |
| Rutin                      | 3653.78        | 36.80 | 3769.77 | 6.49  | 3548.19 | 19.48 | 3336.50 | 24.80 | 1384.94       | 17.42 | 3161.55 | 0.91  | 3119.60 | 3.28  | 2858.19 | 13.13 |
| 4,5-dicaffeoylquinic acids | 3246.64        | 23.71 | 3771.38 | 38.06 | 3746.37 | 41.80 | 3705.61 | 21.17 | 1049.45       | 3.99  | 3052.21 | 12.52 | 3119.29 | 5.81  | 3035.56 | 15.51 |
| Kaempferol-3-O-rutinoside  | 102.55         | 4.96  | 108.08  | 0.25  | 94.28   | 0.41  | 92.40   | 0.44  | 34.72         | 0.49  | 78.77   | 1.43  | 81.64   | 1.20  | 87.12   | 0.52  |
| Quercetin                  | 38.46          | 0.96  | 61.33   | 0.21  | 42.06   | 1.63  | -       | -     | 32.22         | 1.75  | 64.50   | 0.69  | 56.74   | 1.90  | -       | -     |
| Kampferol                  | 36.26          | 0.07  | 30.45   | 0.28  | 24.04   | 0.38  | 13.27   | 0.24  | 17.73         | 0.22  | 27.06   | 0.18  | 24.64   | 0.03  | 20.83   | 0.91  |
| Tussilagone                | 2543.31        | 3.32  | 2250.00 | 7.96  | 2483.04 | 31.02 | 2529.75 | 20.76 | 2229.55       | 16.60 | 2390.81 | 1.3   | 2289.14 | 11.30 | 2319.36 | 10.36 |

**Support 1(B). Extraction efficiency of different solvent volume (µg/g, n=3)**

|                        | 10ml    |       | 15ml    |       | 20ml    |       |
|------------------------|---------|-------|---------|-------|---------|-------|
|                        | Mean    | SD    | Mean    | SD    | Mean    | SD    |
| Gallic acid            | 20.27   | 0.94  | 11.32   | 0.20  | 8.45    | 0.86  |
| Neochlorogenic acid    | 388.52  | 5.68  | 206.89  | 1.02  | 157.23  | 1.14  |
| Chlorogenic acid       | 5142.08 | 22.98 | 2934.90 | 12.02 | 2251.54 | 14.05 |
| Caffeic acid           | 153.93  | 1.35  | 85.59   | 3.37  | 61.99   | 2.17  |
| Cryptochlorogenic acid | 678.81  | 28.46 | 380.26  | 2.86  | 292.67  | 2.20  |

|                                   |         |       |         |       |         |       |
|-----------------------------------|---------|-------|---------|-------|---------|-------|
| <b>3,4-dicaffeoylquinic acids</b> | 3722.77 | 79.96 | 2326.17 | 22.33 | 1767.51 | 14.88 |
| <b>Hyperoside</b>                 | 1317.51 | 1.82  | 716.74  | 5.64  | 524.58  | 7.33  |
| <b>Rutin</b>                      | 3769.77 | 6.49  | 2066.58 | 16.16 | 1561.44 | 14.57 |
| <b>4,5-dicaffeoylquinic acids</b> | 3771.38 | 38.06 | 2732.29 | 10.79 | 2104.85 | 18.39 |
| <b>Kaempferol-3-O-rutinoside</b>  | 108.08  | 0.25  | 61.88   | 0.47  | 48.34   | 0.80  |
| <b>Quercetin</b>                  | 61.33   | 0.21  | 44.55   | 0.29  | 35.22   | 1.17  |
| <b>Kampferol</b>                  | 30.45   | 0.28  | 20.59   | 0.11  | 15.33   | 0.15  |
| <b>Tussilagone</b>                | 2250.00 | 7.96  | 2193.46 | 30.72 | 1034.05 | 19.66 |

### Support 1 (C). Extraction efficiency of different extraction method ( $\mu\text{g/g}$ , $n=3$ )

|                                   | Ultrasonic |       | Reflux  |       |
|-----------------------------------|------------|-------|---------|-------|
|                                   | Mean       | SD    | Mean    | SD    |
| <b>Gallic acid</b>                | 20.27      | 0.94  | 18.35   | 0.09  |
| <b>Neochlorogenic acid</b>        | 388.52     | 5.68  | 354.66  | 1.86  |
| <b>Chlorogenic acid</b>           | 5142.08    | 22.98 | 4755.95 | 41.15 |
| <b>Caffeic acid</b>               | 153.93     | 1.35  | 146.59  | 0.89  |
| <b>Cryptochlorogenic acid</b>     | 678.81     | 28.46 | 643.60  | 5.82  |
| <b>3,4-dicaffeoylquinic acids</b> | 3722.77    | 79.96 | 3074.35 | 4.29  |
| <b>Hyperoside</b>                 | 1317.51    | 1.82  | 1056.36 | 10.32 |
| <b>Rutin</b>                      | 3769.77    | 6.49  | 3110.76 | 23.25 |
| <b>4,5-dicaffeoylquinic acids</b> | 3771.38    | 38.06 | 3733.59 | 1.45  |
| <b>Kaempferol-3-O-rutinoside</b>  | 108.08     | 0.25  | 73.83   | 1.16  |
| <b>Quercetin</b>                  | 61.33      | 0.21  | 96.96   | 0.22  |
| <b>Kampferol</b>                  | 30.45      | 0.28  | 30.33   | 0.00  |
| <b>Tussilagone</b>                | 2250.00    | 7.96  | 3221.90 | 4.28  |

**Support 1(D). Extraction efficiency of different extraction time (µg/g, n=3)**

|                            | 30min   |       | 45min   |       | 60min   |       | 90min   |       |
|----------------------------|---------|-------|---------|-------|---------|-------|---------|-------|
|                            | Mean    | SD    | Mean    | SD    | Mean    | SD    | Mean    | SD    |
| Gallic acid                | 10.11   | 0.13  | 14.16   | 0.80  | 20.27   | 0.94  | 19.37   | 0.26  |
| Neochlorogenic acid        | 175.27  | 1.06  | 251.39  | 1.22  | 388.52  | 5.68  | 318.13  | 2.78  |
| Chlorogenic acid           | 2414.49 | 14.46 | 3478.53 | 16.26 | 5142.08 | 22.98 | 4440.22 | 55.88 |
| Caffeic acid               | 75.29   | 0.49  | 102.04  | 0.49  | 153.93  | 1.35  | 136.25  | 2.32  |
| Cryptochlorogenic acid     | 329.80  | 1.97  | 469.66  | 2.31  | 678.81  | 28.46 | 601.61  | 7.42  |
| 3,4-dicaffeoylquinic acids | 1829.14 | 11.22 | 2732.03 | 12.94 | 3722.77 | 79.96 | 3302.94 | 22.73 |
| Hyperoside                 | 600.59  | 3.44  | 853.14  | 4.01  | 1317.51 | 1.82  | 1007.70 | 11.75 |
| Rutin                      | 1805.97 | 10.84 | 2592.60 | 12.53 | 3769.77 | 6.49  | 3122.30 | 33.05 |
| 4,5-dicaffeoylquinic acids | 2267.12 | 14.31 | 3346.31 | 15.79 | 3771.38 | 38.06 | 4043.54 | 29.63 |
| Kaempferol-3-O-rutinoside  | 43.75   | 0.32  | 62.46   | 0.29  | 108.08  | 0.25  | 70.86   | 5.56  |
| Quercetin                  | 54.92   | 0.31  | 57.43   | 1.15  | 61.33   | 0.21  | 65.96   | 0.37  |
| Kampferol                  | 16.97   | 0.08  | 25.67   | 0.10  | 30.45   | 0.28  | 28.98   | 0.67  |
| Tussilagone                | 1354.92 | 8.22  | 1727.82 | 10.72 | 2250.00 | 7.96  | 2681.51 | 56.22 |
